# Supplementary material for: iTRAQ and virus-induced gene silencing revealed three proteins involved in cold response in bread wheat
Source: PubMed Central journal article supplement (PMC5548720; doi:10.1038/s41598-017-08069-9), 2017-08-08
Supplement: 41598_2017_8069_MOESM1_ESM.pdf [file 41598_2017_8069_MOESM1_ESM.pdf]

# Supplementary information

## **iTRAQ and virus-induced gene silencing revealed three proteins involved in cold response in bread wheat**

Zhang Ning, Zhang Lingran, Zhao Lei, Ren Yan, Cui Dangqun, Chen Jianhui, Wang  
Yongyan, Yu Pengbo, Chen Feng\*

Agronomy College/National Key Laboratory of Wheat and Maize Crop  
Science/Collaborative Innovation Center of Henan Grain Crops, Henan Agricultural  
University, Zhengzhou 450002, China

\* Corresponding authors: F. Chen (chf0088@163.com)

Agronomy College, Henan Agricultural University, 95 Wenhua Road, Zhengzhou  
450002, P. R. China

Phone: +86-371-63558537

**Additional Figure S1.** The success rate of the plants inoculated with different BSMVs

(A) Values are means ( $\pm$ SE) of three independent biological replicates (20 seedlings/group). Bars represent standard errors of triplicate experiments.

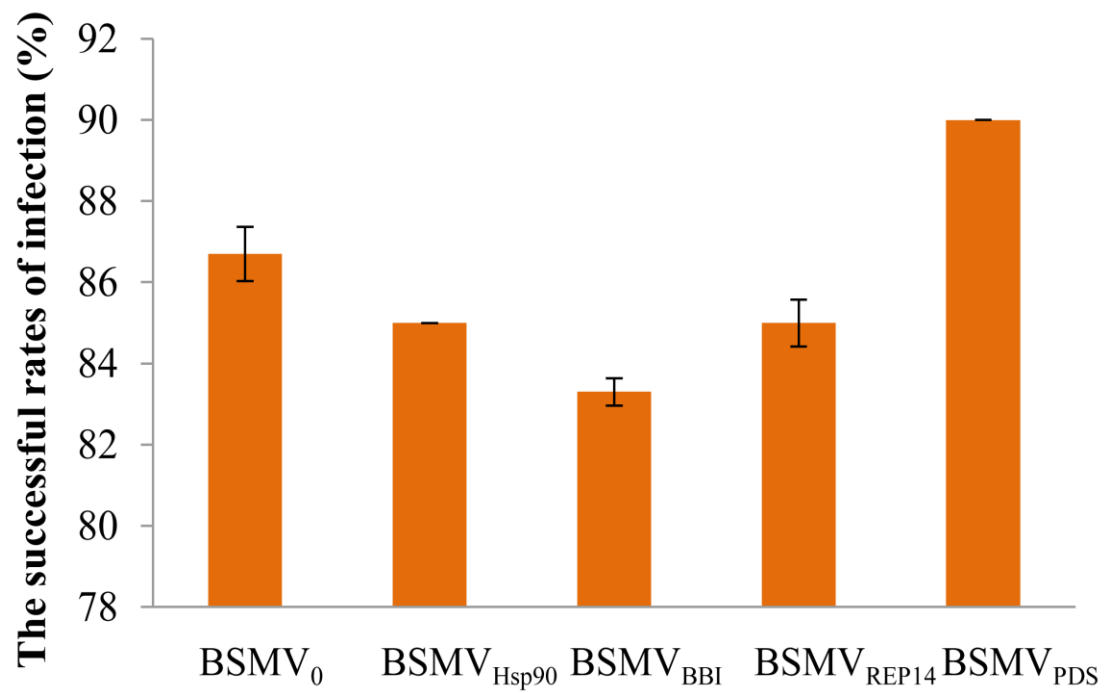

**Additional Figure S2.** TEM images of abnormal chloroplasts with cytoplasmic inclusions containing virus-like particles of thin sections of virus-infected leaves.

**(A)**

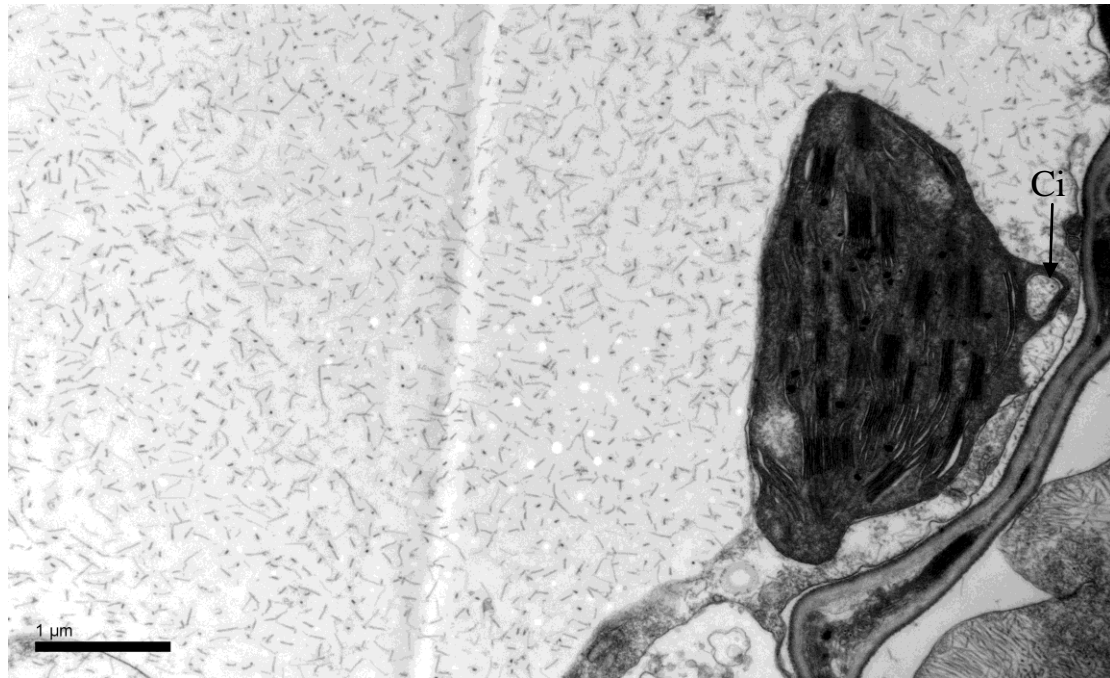

**(B)**

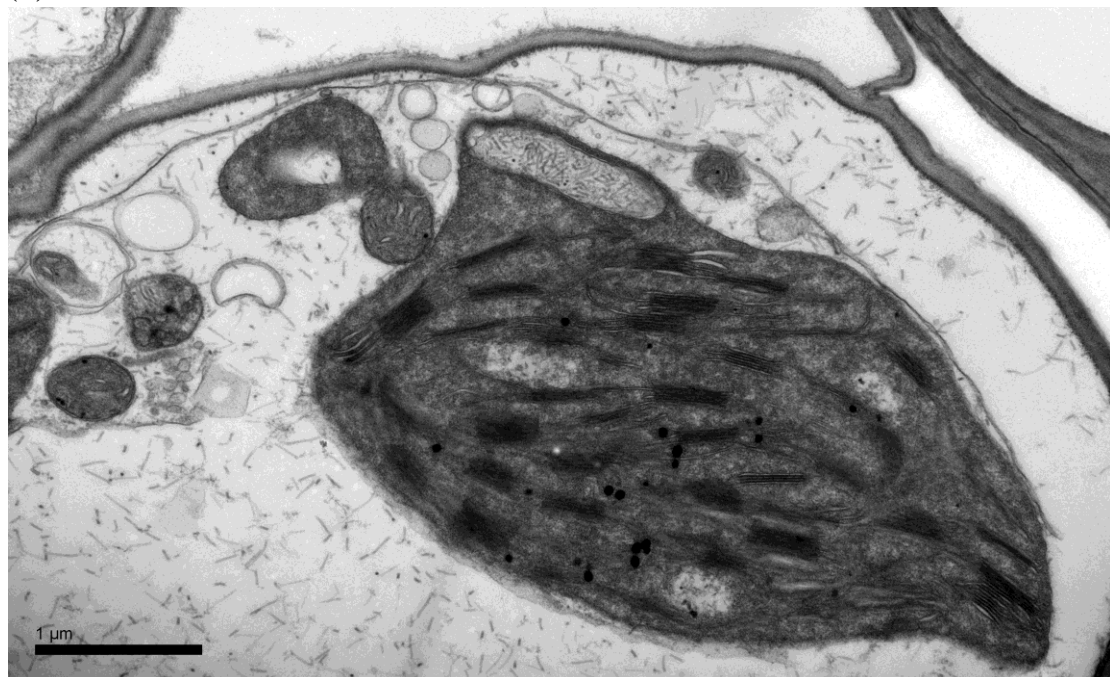

**Additional Table S1.** Primer sequences used in qRT-PCR of the 20 cold-responsive protein genes and VIGS of the three candidate genes

| Accession no. <sup>a</sup> | Forward primer            | Reverse primer             | Produce length (bp) |
|----------------------------|---------------------------|----------------------------|---------------------|
| M7Z4Z1                     | TCCTTCAACCTCAAGTGCGG      | AAGTTGCCGATGATGGGGAG       | 218                 |
| M8BTT2                     | GTCGTTGCAGCACTCCATG       | ATCGCTCTTCCTGTCCAGC        | 260                 |
| F2CQU0                     | AAGTGTGTCAACTGCGATGG      | CATCCTTGAACCTCCCTGCGA      | 100                 |
| M7YSY0                     | TGTTTCGTGGCCTTGCATACT     | CTAGATGCTGGCCCCCTCAAG      | 264                 |
| Q84ZY0                     | TACAGCCGCCATTGTGAAGT      | TGAAAGTTTCGACCCCAGACG      | 145                 |
| M7YJJ9                     | TGAGGACCCTGAACGCCAA       | TGTTGATGGGGAAAGAGACGG      | 150                 |
| A0A0F6NQY1                 | CCAAATGAATGAACCGCCGG      | TGTGCAAATGTTGTGGCAGG       | 324                 |
| O22387                     | CATCGCCATCAACAACACCG      | ATGACGAGGTTGATGCCGAG       | 198                 |
| F2CU34                     | CTGAGGAGGGCAAGGTTGAG      | CCAGTCGTTTGTGAGGCTCT       | 188                 |
| M8BGU7                     | GATCGACCTGCCCTACTCCT      | TCGTCGAGGAAGCTCTGGT        | 102                 |
| Q8S385                     | AGCGAAGTGGACGACAAGG       | CTTGTCCGTGATGCCCTGT        | 105                 |
| M8C3D9                     | TGATCACCCCGGACCTGTT       | GCGGTGGTCTTGTCTTCAC        | 103                 |
| N1QPN2                     | TGTTTACGCCTTCCCTTGCT      | CACCCTTCCATCAGAGCCAG       | 113                 |
| B4ESE2                     | CTTTGCTGTCTGCTCGGTA       | GCTCCCAGATTCACAGGCTT       | 241                 |
| F2DHH7                     | CAACGGCTGCATGTCAACTG      | CATGTCCACCCTTGCCAAGA       | 233                 |
| O80370                     | GGAGGTTTAAGGGGTCCACG      | TCACCTTGACTACACCACGC       | 123                 |
| P46285                     | AAGGGCATCTTCACGAACGT      | TGATCTCGTTCTTGGAGCCG       | 196                 |
| A0ST49                     | CCGATATTCAACAACGCGTCC     | TGGCGGTAGATGACGGAGA        | 167                 |
| I1GTJ6                     | TCGAGGAATGGCTCAAGACG      | GTTCTCGGCGGTGTTAAACG       | 170                 |
| M8BYV1                     | GTGCTACACCCGATCCACAA      | GAGTTCGTTGGGGAGAGCAA       | 228                 |
| <i>β</i> -actin            | GTTCCAATCTATGAGGGATACACGC | GAACCTCCACTGAGAACAACATTACC | 422                 |
| V-REP14                    | GAGTTGAAGAAGGGCGTGGC      | CTTGTCCGTGATGCCCTGT        | 189                 |
| V-BBI                      | CATCGACGGTGCTCTTCATG      | CATCGACGGTGCTCTTCATG       | 198                 |
| V-Hsp90                    | CTGAGGAGGGCAAGGTTGAG      | CCAGTCGTTTGTGAGGCTCT       | 188                 |
| V-PDS                      | TCACAAGTAGCAGCGTCCA       | GGTTTACTGGGGCGTTCACT       | 211                 |

<sup>a</sup> Accession no.: accession number in Uniprot database corresponds to the iTRAQ results, correspondingly are the same as shown in Table S2. (except for *β*-actin and PDS)

**Additional Table S2.** Functional classifications of the differentially accumulated proteins identified by iTRAQ between CSP and CTP

| Spot no. <sup>a</sup> | Proteins                             | MV <sup>b</sup> | pI <sup>c</sup> | Coverage (%) | Nup. <sup>d</sup> | Ratio <sup>e</sup> | P-value     | Plant species        |
|-----------------------|--------------------------------------|-----------------|-----------------|--------------|-------------------|--------------------|-------------|----------------------|
| <b>Unknown</b>        |                                      |                 |                 |              |                   |                    |             |                      |
| M8BZI9                | Hypothetical protein F775_07291      | 42.34           | 9.98            | 8.78         | 1                 | 0.60               | 0.00585264  | <i>A. tauschii</i>   |
| A0A096UU59            | Hypothetical protein F775_29027      | 9.85            | 9.69            | 20           | 1                 | 1.27               | 0.0315009   | <i>A. tauschii</i>   |
| M8BQ48                | Hypothetical protein F775_32603      | 18.49           | 9.57            | 18.64        | 1                 | 0.73               | 0.0316062   | <i>A. tauschii</i>   |
| M7Z4H8                | Hypothetical protein TRIUR3_00731    | 8.87            | 8.51            | 33.33        | 2                 | 1.21               | 0.0388632   | <i>T. urartu</i>     |
| W5DP76                | Hypothetical protein TRIUR3_04889    | 9.17            | 9.32            | 14.12        | 1                 | 0.73               | 0.00431867  | <i>T. urartu</i>     |
| M7ZY44                | Hypothetical protein TRIUR3_10983    | 16.22           | 8.69            | 15.03        | 2                 | 0.72               | 0.00704315  | <i>T. urartu</i>     |
| W5FX26                | Hypothetical protein TRIUR3_12762    | 11.37           | 8.31            | 14.85        | 1                 | 1.27               | 0.0135276   | <i>T. urartu</i>     |
| W5E2P5                | Hypothetical protein TRIUR3_12806    | 19.44           | 10.30           | 6.04         | 1                 | 0.56               | 0.00672056  | <i>T. urartu</i>     |
| I1GR21                | Hypothetical protein TRIUR3_14708    | 38.36           | 7.01            | 3.48         | 1                 | 0.72               | 0.00587336  | <i>T. urartu</i>     |
| M7XL46                | Hypothetical protein TRIUR3_33418    | 14.56           | 8.19            | 14.29        | 1                 | 1.44               | 0.0150124   | <i>T. urartu</i>     |
| F2CXA5                | Predicted protein                    | 47.55           | 4.64            | 20.76        | 1                 | 1.42               | 0.0413252   | <i>H. vulgare</i>    |
| A0A077RU93            | Predicted protein                    | 34.15           | 8.75            | 13.03        | 3                 | 1.21               | 0.0309323   | <i>H. vulgare</i>    |
| T1NNC4                | Predicted protein                    | 11.45           | 9.98            | 12.26        | 1                 | 0.79               | 0.0245215   | <i>H. vulgare</i>    |
| M0X1S6                | Predicted protein                    | 11.66           | 9.63            | 12.61        | 1                 | 0.67               | 0.0221063   | <i>H. vulgare</i>    |
| F2DA26                | Predicted protein                    | 35.63           | 8.44            | 9.79         | 2                 | 0.80               | 0.0164073   | <i>H. vulgare</i>    |
| I1HN58                | Uncharacterized protein LOC100834407 | 9.50            | 9.94            | 10.11        | 1                 | 1.43               | 0.0166079   | <i>B. distachyon</i> |
| A0A096ULD8            | Hypothetical protein TRIUR3_11917    | 41.33           | 5.49            | 9.52         | 2                 | 0.76               | 0.0203294   | <i>T. urartu</i>     |
| W5BQ56                | Predicted protein                    | 38.74           | 5.81            | 29.44        | 1                 | 0.70               | 0.00281769  | <i>H. vulgare</i>    |
| M8AZ52                | Hypothetical protein F775_07046      | 24.28           | 7.47            | 20.18        | 3                 | 0.73               | 0.0212763   | <i>A. tauschii</i>   |
| M8BXT4                | Hypothetical protein F775_30291      | 23.28           | 8.91            | 27.44        | 2                 | 0.78               | 0.0180222   | <i>A. tauschii</i>   |
| N1QQE6                | Hypothetical protein F775_32959      | 7.75            | 4.06            | 17.81        | 1                 | 0.68               | 0.0146192   | <i>A. tauschii</i>   |
| M7ZY79                | Hypothetical protein TRIUR3_26332    | 85.64           | 7.85            | 8.66         | 1                 | 1.23               | 0.000330028 | <i>T. urartu</i>     |

| Spot no. <sup>a</sup>      | Proteins                                      | MV <sup>b</sup> | pI <sup>c</sup> | Coverage (%) | Nup. <sup>d</sup> | Ratio <sup>e</sup> | P-value     | Plant species         |
|----------------------------|-----------------------------------------------|-----------------|-----------------|--------------|-------------------|--------------------|-------------|-----------------------|
| <b>Proteins metabolism</b> |                                               |                 |                 |              |                   |                    |             |                       |
| M0VC57                     | 30S ribosomal protein chloroplastic           | 10.70           | 10.11           | 31.91        | 1                 | 0.53               | 0.00806831  | <i>H. vulgare</i>     |
| I1GY66                     | 30S ribosomal protein S31, chloroplastic-like | 13.54           | 9.45            | 7.2          | 1                 | 0.77               | 0.0274252   | <i>B. distachyon</i>  |
| W5AY25                     | plastid-specific 30S ribosomal protein 2      | 19.12           | 5.14            | 50.87        | 1                 | 1.41               | 0.0241303   | <i>A. tauschii</i>    |
| M7Z315                     | 40S ribosomal protein S13-1                   | 16.89           | 10.36           | 7.95         | 1                 | 0.82               | 0.0231845   | <i>T. urartu</i>      |
| K3ZXP8                     | 40S ribosomal protein S15-like                | 17.29           | 10.20           | 20.26        | 2                 | 0.81               | 0.0163879   | <i>S. italica</i>     |
| W5AH72                     | 40S ribosomal protein S17-4                   | 13.67           | 9.52            | 53.33        | 1                 | 0.64               | 0.0029642   | <i>A. tauschii</i>    |
| W5A5L6                     | 40S ribosomal protein S17-4                   | 16.48           | 10.21           | 44.76        | 1                 | 1.35               | 0.00145439  | <i>T. urartu</i>      |
| M7YRN1                     | 40S ribosomal protein S20                     | 14.10           | 9.44            | 18.9         | 1                 | 0.75               | 0.046111    | <i>T. aestivum</i>    |
| F2EA93                     | 40S ribosomal protein S20                     | 14.05           | 9.51            | 18.9         | 1                 | 0.75               | 0.0231379   | <i>H. vulgare</i>     |
| W5EUP3                     | 40S ribosomal protein S26-1                   | 14.28           | 10.70           | 27.48        | 1                 | 0.82               | 0.0176856   | <i>A. tauschii</i>    |
| F2CV88                     | 40S ribosomal protein S26-2-like              | 15.68           | 11.03           | 27.08        | 1                 | 0.56               | 0.0073136   | <i>H. vulgare</i>     |
| I1I8W1                     | 60S ribosomal protein L17-2-like              | 18.91           | 10.14           | 9.7          | 1                 | 0.81               | 0.0216686   | <i>B. distachyon</i>  |
| W5BMT1                     | 60S ribosomal protein L19-2                   | 7.48            | 10.62           | 36.76        | 1                 | 1.47               | 0.011655    | <i>A. tauschii</i>    |
| M8AWE2                     | 60S ribosomal protein L22-2                   | 14.44           | 9.55            | 29.77        | 2                 | 0.76               | 0.00601131  | <i>A. tauschii</i>    |
| R7W4C5                     | 60S ribosomal protein L27-3                   | 14.40           | 10.29           | 18.6         | 1                 | 0.70               | 0.00286792  | <i>A. tauschii</i>    |
| W5BNZ6                     | 60S ribosomal protein L27a-3                  | 15.98           | 10.67           | 35.17        | 2                 | 0.80               | 0.00164843  | <i>T. urartu</i>      |
| A0A0A9QPU7                 | 60S ribosomal protein L36-2-like              | 8.56            | 11.11           | 13.7         | 1                 | 1.21               | 0.0216967   | <i>B. distachyon</i>  |
| R7VYR3                     | Histone H2A                                   | 13.07           | 10.68           | 25.2         | 1                 | 0.64               | 0.0347828   | <i>A. tauschii</i>    |
| B6TFY8                     | Histone H4                                    | 11.42           | 11.47           | 50.49        | 1                 | 0.22               | 0.000362137 | <i>Z. mays</i>        |
| Q9FYV3                     | Elongation factor                             | 49.29           | 8.95            | 29.02        | 1                 | 0.32               | 0.000184401 | <i>S. officinarum</i> |
| W5G125                     | Elongation factor 2                           | 93.87           | 6.16            | 33.81        | 1                 | 0.82               | 0.0459369   | <i>T. urartu</i>      |
| R7W2H4                     | Elongation factor ts                          | 100.90          | 5.01            | 32.02        | 1                 | 0.67               | 0.00423554  | <i>A. tauschii</i>    |

| Spot no. <sup>a</sup> | Proteins                                                                     | MV <sup>b</sup> | pI <sup>c</sup> | Coverage (%) | Nup. <sup>d</sup> | Ratio <sup>e</sup> | P-value     | Plant species        |
|-----------------------|------------------------------------------------------------------------------|-----------------|-----------------|--------------|-------------------|--------------------|-------------|----------------------|
| C5X4S1                | Elongation factor Ts family protein                                          | 102.05          | 5.26            | 7.47         | 1                 | 1.23               | 0.00921989  | <i>S. bicolor</i>    |
| F2DJN3                | Proteasomal ubiquitin receptor ADRM1                                         | 33.49           | 4.55            | 15.03        | 2                 | 0.80               | 0.0385949   | <i>H. vulgare</i>    |
| A0A088CDA2            | Leukotriene A-4 hydrolase homolog                                            | 12.32           | 4.32            | 12.84        | 1                 | 0.74               | 0.0397254   | <i>B. distachyon</i> |
| W5B7Z6                | Adenosylhomocysteinase                                                       | 53.21           | 5.80            | 31.34        | 1                 | 1.26               | 0.019354    | <i>A. tauschii</i>   |
| I1J202                | Aminomethyltransferase, mitochondrial-like                                   | 43.81           | 8.57            | 31.87        | 2                 | 1.21               | 0.0129526   | <i>B. distachyon</i> |
| M8AT56                | Ankyrin repeat domain protein expressed                                      | 29.88           | 4.56            | 35.19        | 1                 | 1.38               | 0.0139324   | <i>A. tauschii</i>   |
| N1QZ60                | Aspartic proteinase nepenthesin-1                                            | 48.67           | 6.52            | 2.88         | 1                 | 0.79               | 0.0418379   | <i>A. tauschii</i>   |
| W5GPA3                | Eukaryotic translation initiation factor 3 subunit F-like                    | 22.29           | 5.25            | 12.44        | 1                 | 1.40               | 0.0147752   | <i>H. vulgare</i>    |
| M8CRB5                | F-box protein SKIP8                                                          | 27.19           | 5.27            | 13.1         | 3                 | 0.72               | 0.0247892   | <i>A. tauschii</i>   |
| M7YSY0                | Histidyl-tRNA synthetase                                                     | 45.70           | 6.00            | 7.44         | 2                 | 0.78               | 0.0389197   | <i>T. urartu</i>     |
| J3L8Q1                | Hydroxypyruvate reductase                                                    | 42.02           | 7.40            | 36.53        | 1                 | 1.24               | 0.00169442  | <i>O. sativa</i>     |
| M7YX26                | Methylthioadenosine/S-adenosylhomocysteine nucleosidase                      | 37.09           | 8.66            | 6.94         | 2                 | 0.79               | 0.0357827   | <i>T. urartu</i>     |
| W5FEI2                | Aspartate carbamoyltransferase 3, chloroplastic                              | 16.65           | 7.44            | 8.05         | 1                 | 0.79               | 0.0067484   | <i>A. tauschii</i>   |
| A0A077S078            | ATP-dependent Clp protease proteolytic subunit 3, chloroplastic-like         | 29.86           | 9.20            | 5.54         | 1                 | 0.83               | 0.0103021   | <i>B. distachyon</i> |
| F2CSC3                | ATP-dependent Clp protease proteolytic subunit-related protein chloroplastic | 30.92           | 9.26            | 10.28        | 2                 | 0.74               | 0.000917406 | <i>H. vulgare</i>    |
| W5GYP6                | Histidinol-phosphate chloroplastic-like                                      | 40.60           | 6.93            | 4.67         | 1                 | 0.79               | 0.0456801   | <i>H. vulgare</i>    |
| F2E066                | Chloroplast nucleoid DNA-binding protein CND41                               | 18.90           | 8.59            | 6.04         | 1                 | 0.67               | 0.0127066   | <i>H. vulgare</i>    |
| M8C184                | Mitochondrial glycoprotein                                                   | 24.07           | 4.37            | 15.49        | 1                 | 0.78               | 0.0208519   | <i>A. tauschii</i>   |
| W5FWL8                | TPA: histone acetyltransferase HPA2 and                                      | 16.94           | 10.39           | 8.23         | 1                 | 1.22               | 0.00360847  | <i>A. tauschii</i>   |

| Spot no. <sup>a</sup>      | Proteins                                                            | MV <sup>b</sup> | pI <sup>c</sup> | Coverage (%) | Nup. <sup>d</sup> | Ratio <sup>e</sup> | P-value     | Plant species        |
|----------------------------|---------------------------------------------------------------------|-----------------|-----------------|--------------|-------------------|--------------------|-------------|----------------------|
|                            | acetyltransferase                                                   |                 |                 |              |                   |                    |             |                      |
| B9VTA3                     | Ubiquitin fusion degradation 1 protein                              | 35.47           | 7.44            | 4.95         | 1                 | 0.73               | 0.00406736  | <i>T. aestivum</i>   |
| M8AKZ8                     | WD-40 repeat                                                        | 130.30          | 6.15            | 4.03         | 2                 | 1.26               | 0.0260271   | <i>A. tauschii</i>   |
| M0yi51                     | Translation elongation initiation factor family protein             | 34.66           | 8.18            | 19.68        | 1                 | 1.27               | 0.0431456   | <i>A. Tauschii</i>   |
| W5AN26                     | Dihydrodipicolinate reductase                                       | 25.57           | 8.69            | 9.28         | 1                 | 0.78               | 0.044142    | <i>H. vulgare</i>    |
| F2CQU0                     | Protein disulfide-isomerase LQY1-like                               | 16.79           | 7.50            | 13.38        | 1                 | 1.23               | 0.0392989   | <i>H. vulgare</i>    |
| M7ZVH9                     | Protease Do-like 5, chloroplastic                                   | 27.88           | 5.82            | 9.09         | 2                 | 0.55               | 0.0000739   | <i>T. urartu</i>     |
| W5HUN1                     | Thylakoid membrane protein slr0575-like                             | 12.05           | 8.44            | 21.15        | 1                 | 1.22               | 0.0332807   | <i>H. vulgare</i>    |
| W5FWD2                     | Dihydrolipoamide acetyltransferase                                  | 31.39           | 9.50            | 15.33        | 1                 | 0.66               | 0.023494    | <i>H. vulgare</i>    |
| W5FH48                     | Dihydrolipoamide acetyltransferase                                  | 36.87           | 8.92            | 12.57        | 1                 | 0.79               | 0.0227194   | <i>S. bicolor</i>    |
| I1HK18                     | Nascent polypeptide-associated complex subunit alpha-like protein 1 | 22.24           | 4.40            | 21.57        | 1                 | 0.78               | 0.00496917  | <i>B. distachyon</i> |
| W5GKA6                     | HOP                                                                 | 34.05           | 7.30            | 14.97        | 1                 | 0.43               | 0.000818621 | <i>T. aestivum</i>   |
| F2CU34                     | Heat shock protein 90                                               | 80.36           | 5.06            | 22.71        | 1                 | 1.25               | 0.0201855   | <i>H. vulgare</i>    |
| W4ZRZ2                     | Sorting and assembly machinery component 50-A-like protein          | 56.38           | 5.92            | 2.89         | 1                 | 0.83               | 0.0192565   | <i>A. tauschii</i>   |
| <b>Sulfur metabolism</b>   |                                                                     |                 |                 |              |                   |                    |             |                      |
| A0A096UUP6                 | S-adenosylmethionine synthase 1                                     | 51.90           | 5.81            | 20.51        | 1                 | 1.23               | 0.0388076   | <i>T. urartu</i>     |
| W5FLB0                     | Cysteine synthase                                                   | 46.18           | 8.84            | 32.95        | 2                 | 1.30               | 0.000457825 | <i>T. aestivum</i>   |
| <b>Nitrogen metabolism</b> |                                                                     |                 |                 |              |                   |                    |             |                      |
| M0W559                     | Ferredoxin-nitrite reductase precursor                              | 56.22           | 5.91            | 23.91        | 1                 | 1.21               | 0.0386021   | <i>H. vulgare</i>    |
| W5GWJ4                     | Ferredoxin-nitrite reductase precursor                              | 56.23           | 6.20            | 31.62        | 2                 | 1.28               | 0.0137346   | <i>T. aestivum</i>   |



| Spot no. <sup>a</sup> | Proteins                                                               | MV <sup>b</sup> | pI <sup>c</sup> | Coverage (%) | Nup. <sup>d</sup> | Ratio <sup>e</sup> | P-value     | Plant species        |
|-----------------------|------------------------------------------------------------------------|-----------------|-----------------|--------------|-------------------|--------------------|-------------|----------------------|
| <b>Stress/defense</b> |                                                                        |                 |                 |              |                   |                    |             |                      |
| M7ZFY1                | Peroxidase 1                                                           | 34.72           | 7.83            | 9.37         | 1                 | 0.82               | 0.0214046   | <i>T. urartu</i>     |
| W5I0G1                | Peroxidase 1                                                           | 16.41           | 6.51            | 26.11        | 2                 | 0.65               | 0.0155338   | <i>T. urartu</i>     |
| W5ETT8                | Oxalate oxidase GF-2.8                                                 | 7.13            | 9.54            | 15.15        | 1                 | 0.53               | 0.00271372  | <i>A. tauschii</i>   |
| W5B840                | Peroxidase 12                                                          | 34.16           | 5.90            | 19.88        | 1                 | 0.74               | 0.0194406   | <i>H. vulgare</i>    |
| M8C3D9                | Peroxidase 12                                                          | 30.66           | 5.49            | 21.84        | 1                 | 0.53               | 0.0167645   | <i>A. tauschii</i>   |
| T1LHN5                | Peroxidase 70                                                          | 26.63           | 5.62            | 21.51        | 1                 | 0.53               | 0.00686877  | <i>A. tauschii</i>   |
| W5BZ90                | Lipoxygenase 1                                                         | 54.38           | 7.61            | 26.05        | 1                 | 0.43               | 0.00423582  | <i>T. urartu</i>     |
| M8BYV1                | Putative lipoxygenase 4                                                | 38.07           | 8.03            | 16.23        | 1                 | 0.46               | 0.000348988 | <i>A. tauschii</i>   |
| T1LSZ4                | Lipoxygenase 2.1, chloroplastic                                        | 104.05          | 6.00            | 6.02         | 1                 | 0.73               | 0.00562947  | <i>A. tauschii</i>   |
| K3XV98                | Lipoxygenase 2.1, chloroplastic-like                                   | 95.29           | 6.04            | 3.11         | 1                 | 0.70               | 0.0282982   | <i>S. italica</i>    |
| M7ZI22                | NAD(P)H-quinone oxidoreductase subunit H, chloroplastic                | 54.82           | 9.50            | 11.94        | 1                 | 0.75               | 0.0220624   | <i>T. urartu</i>     |
| M0W2C4                | NADH dehydrogenase [ubiquinone] iron-sulfur protein mitochondrial-like | 75.19           | 6.42            | 21.18        | 1                 | 0.68               | 0.0362073   | <i>H. vulgare</i>    |
| W5H151                | Alcohol dehydrogenase class-3-like                                     | 40.63           | 6.81            | 25.72        | 1                 | 1.23               | 0.0209683   | <i>B. distachyon</i> |
| O80370                | VER2                                                                   | 32.42           | 7.18            | 23           | 5                 | 0.39               | 0.00621467  | <i>T. aestivum</i>   |
| W5CEZ6                | Calreticulin-3                                                         | 44.97           | 6.76            | 8.05         | 2                 | 1.21               | 0.011462    | <i>T. urartu</i>     |
| K7UNK1                | Mitochondrial uncoupling protein 3                                     | 15.55           | 9.26            | 11.19        | 1                 | 1.23               | 0.00398343  | <i>Z. mays</i>       |
| F2DAA1                | Cold-regulated protein                                                 | 17.60           | 5.06            | 14.02        | 2                 | 0.75               | 0.0348304   | <i>H. vulgare</i>    |
| Q8S385                | REP14                                                                  | 14.73           | 6.19            | 48.63        | 1                 | 2.30               | 0.0172345   | <i>S. cereale</i>    |
| M7Z4Z1                | Late embryogenesis abundant protein lea14-A                            | 17.82           | 5.21            | 6.75         | 1                 | 1.36               | 0.0432786   | <i>T. urartu</i>     |
| W5EEV4                | Putative inactive purple acid phosphatase 27                           | 69.08           | 6.46            | 7.94         | 4                 | 0.79               | 0.00581916  | <i>A. tauschii</i>   |

| Spot no. <sup>a</sup>          | Proteins                                                    | MV <sup>b</sup> | pI <sup>c</sup> | Coverage (%) | Nup. <sup>d</sup> | Ratio <sup>e</sup> | P-value    | Plant species        |
|--------------------------------|-------------------------------------------------------------|-----------------|-----------------|--------------|-------------------|--------------------|------------|----------------------|
| F2DHH7                         | Superoxide dismutase [Cu-Zn]                                | 15.09           | 6.28            | 31.58        | 1                 | 1.23               | 0.0073188  | <i>H. vulgare</i>    |
| I1GRB8                         | Superoxide dismutase [Cu-Zn] 4A-like                        | 15.14           | 6.05            | 8.55         | 1                 | 0.46               | 0.00249884 | <i>B. distachyon</i> |
| J3MPG1                         | Ascorbate peroxidase                                        | 27.14           | 5.36            | 22           | 1                 | 1.30               | 0.0365614  | <i>O. sativa</i>     |
| W5GFX3                         | Peroxiredoxin-2E- chloroplastic-like                        | 23.26           | 8.75            | 59.29        | 1                 | 0.81               | 0.0102177  | <i>H. vulgare</i>    |
| N1QPN2                         | Monodehydroascorbate reductase, chloroplastic               | 52.41           | 7.71            | 14.97        | 1                 | 1.24               | 0.0127119  | <i>A. tauschii</i>   |
| Q84UH6                         | Dehydroascorbate reductase                                  | 23.34           | 6.29            | 61.32        | 2                 | 0.80               | 0.0113331  | <i>T. aestivum</i>   |
| A0ST49                         | Polyphenol oxidase                                          | 14.78           | 5.15            | 10           | 1                 | 1.41               | 0.00383159 | <i>T. aestivum</i>   |
| M8B4A4                         | Glutathione transferase                                     | 25.18           | 5.34            | 7.3          | 1                 | 1.22               | 0.0176968  | <i>T. aestivum</i>   |
| R7WCP0                         | Probable glutathione S-transferase GSTU6-like               | 25.70           | 5.58            | 24.07        | 2                 | 0.79               | 0.0372786  | <i>A. tauschii</i>   |
| D8L9S2                         | Glutamate decarboxylase, putative, expressed                | 54.07           | 5.78            | 28.34        | 1                 | 1.32               | 0.00620892 | <i>T. aestivum</i>   |
| F1DKC1                         | Catalase                                                    | 56.85           | 7.08            | 8.3          | 2                 | 0.80               | 0.0383464  | <i>T. aestivum</i>   |
| W5DB05                         | Thioredoxin-like protein                                    | 8.43            | 5.10            | 39.19        | 1                 | 1.37               | 0.0334654  | <i>A. tauschii</i>   |
| W5EC03                         | Rubredoxin family expressed                                 | 16.86           | 9.96            | 15.69        | 1                 | 1.24               | 0.0284005  | <i>H. vulgare</i>    |
| M8BHR2                         | Monothiol glutaredoxin-S12, chloroplastic                   | 30.55           | 7.93            | 3.86         | 1                 | 0.80               | 0.0032993  | <i>A. tauschii</i>   |
| B4ESE2                         | Legumain                                                    | 53.06           | 6.42            | 2.69         | 1                 | 1.48               | 0.0106641  | <i>H. vulgare</i>    |
| M7YVE8                         | Bowman-Birk type protease inhibitor                         | 9.59            | 8.35            | 18.89        | 1                 | 1.28               | 0.00711271 | <i>T. aestivum</i>   |
| M0XIW2                         | Complex I intermediate-associated protein 30                | 69.20           | 9.01            | 18.97        | 1                 | 1.62               | 0.035929   | <i>B. distachyon</i> |
| A0A096UQG2                     | Acid phosphatase 1                                          | 14.49           | 9.74            | 8.4          | 1                 | 0.66               | 0.0353554  | <i>T. urartu</i>     |
| <b>Carbohydrate catabolism</b> |                                                             |                 |                 |              |                   |                    |            |                      |
| O22387                         | Glyceraldehyde-3-phosphate dehydrogenase                    | 28.31           | 9.57            | 42.91        | 1                 | 1.33               | 0.0211264  | <i>O. sativa</i>     |
| J3LJK2                         | Glyceraldehyde-3-phosphate dehydrogenase chloroplastic-like | 49.71           | 7.91            | 34.26        | 3                 | 1.25               | 0.00375161 | <i>O. sativa</i>     |
| C1JYE0                         | 3-phosphoglycerate kinase, partial                          | 31.34           | 5.01            | 44.63        | 1                 | 0.48               | 0.00628541 | <i>D. villosum</i>   |

| Spot no. <sup>a</sup> | Proteins                                                         | MV <sup>b</sup> | pI <sup>c</sup> | Coverage (%) | Nup. <sup>d</sup> | Ratio <sup>e</sup> | P-value    | Plant species         |
|-----------------------|------------------------------------------------------------------|-----------------|-----------------|--------------|-------------------|--------------------|------------|-----------------------|
| I1H2R0                | 6-phosphogluconate dehydrogenase, decarboxylating-like isoform 1 | 53.85           | 6.18            | 19.36        | 2                 | 0.57               | 0.0238126  | <i>B. distachyon</i>  |
| W5E8Y1                | Beta-glucosidase 8                                               | 52.74           | 8.19            | 3.18         | 1                 | 0.68               | 0.0207587  | <i>T. urartu</i>      |
| A0A0D9WD69            | Fructose-6-phosphate-2-kinase/fructose-2,6-bisphosphatase        | 86.74           | 6.68            | 9.36         | 1                 | 1.31               | 0.0273614  | <i>O. sativa</i>      |
| M8C3S5                | Malate dehydrogenase (NADP), chloroplastic                       | 41.98           | 5.53            | 25.91        | 2                 | 0.77               | 0.0480375  | <i>A. tauschii</i>    |
| M0XEC5                | Phosphoenolpyruvate carboxylase                                  | 113.31          | 5.48            | 22.13        | 1                 | 1.40               | 0.0020871  | <i>H. vulgare</i>     |
| M7ZKL3                | Phosphoenolpyruvate carboxylase 2                                | 108.40          | 6.10            | 16.95        | 12                | 1.20               | 0.0129287  | <i>T. urartu</i>      |
| H9ZX57                | Phosphoglycerate kinase                                          | 31.42           | 5.01            | 67.11        | 1                 | 0.48               | 0.00534659 | <i>T. timopheevii</i> |
| W5FQX8                | Putative 6-phosphogluconolactonase 4, chloroplastic              | 23.00           | 5.85            | 11.06        | 2                 | 0.79               | 0.0485737  | <i>A. tauschii</i>    |
| W5I774                | Sucrose synthase 1                                               | 92.34           | 6.09            | 16.21        | 1                 | 0.75               | 0.00174838 | <i>A. tauschii</i>    |
| Q84ZY0                | Sucrose-phosphatase                                              | 47.14           | 6.37            | 14.93        | 5                 | 1.24               | 0.0369452  | <i>A. speltoides</i>  |
| I1HWP9                | 3-isopropylmalate dehydratase-like                               | 55.85           | 7.43            | 18.02        | 1                 | 0.34               | 0.0038624  | <i>B. distachyon</i>  |
| M0Y0Y6                | Cell wall invertase 1                                            | 47.35           | 8.16            | 5.87         | 2                 | 0.80               | 0.0148794  | <i>H. vulgare</i>     |
| <b>Photosynthesis</b> |                                                                  |                 |                 |              |                   |                    |            |                       |
| K7U064                | Photosystem I subunit VII                                        | 8.72            | 6.47            | 55           | 1                 | 1.38               | 0.0221731  | <i>Z. mays</i>        |
| A0A089N372            | Photosystem I subunit VII                                        | 8.88            | 6.92            | 81.48        | 1                 | 0.82               | 0.0288271  | <i>O. sativa</i>      |
| F2CQY2                | LHCI-680, photosystem I antenna protein                          | 27.28           | 5.94            | 29.02        | 4                 | 1.29               | 0.0253433  | <i>H. vulgare</i>     |
| Q6XW17                | Photosystem II polypeptide                                       | 10.19           | 8.65            | 54.55        | 5                 | 1.23               | 0.0197746  | <i>T. aestivum</i>    |
| W5D4R0                | Photosystem II subunit                                           | 28.29           | 8.82            | 31.25        | 1                 | 1.31               | 0.022308   | <i>H. vulgare</i>     |
| Q66MG6                | Ribulose-1,5-bisphosphate carboxylase/oxygenase large subunit    | 49.74           | 6.92            | 37.42        | 1                 | 0.81               | 0.0159074  | <i>S. cultivar</i>    |

| Spot no. <sup>a</sup> | Proteins                                                                             | MV <sup>b</sup> | pI <sup>c</sup> | Coverage (%) | Nup. <sup>d</sup> | Ratio <sup>e</sup> | P-value     | Plant species          |
|-----------------------|--------------------------------------------------------------------------------------|-----------------|-----------------|--------------|-------------------|--------------------|-------------|------------------------|
| U5IM61                | Ribulose-1,5-bisphosphate carboxylase/oxygenase large subunit, partial (chloroplast) | 21.76           | 6.57            | 29.44        | 1                 | 1.37               | 0.0431888   | <i>N. megapotamia</i>  |
| Q37230                | Ribulose-1,5-bisphosphate carboxylase/oxygenase large subunit, partial (chloroplast) | 48.75           | 7.05            | 31.59        | 1                 | 0.54               | 0.00334969  | <i>L. humilis</i>      |
| G0WY03                | Ribulose-1,5-bisphosphate carboxylase/oxygenase large subunit, partial (chloroplast) | 25.84           | 6.35            | 59.74        | 1                 | 0.81               | 0.00151791  | <i>B. remotiflorus</i> |
| I4EBI1                | Ribulose-1,5-bisphosphate carboxylase/oxygenase large subunit, partial (chloroplast) | 49.42           | 6.92            | 35.79        | 1                 | 0.06               | 0.000212022 | <i>C. caricoides</i>   |
| Q9SAW6                | Ribulose-1,5-bisphosphate carboxylase/oxygenase small subunit                        | 18.52           | 8.56            | 53.33        | 1                 | 2.66               | 0.00865588  | <i>T. aestivum</i>     |
| W5BMD1                | Ribulose bisphosphate carboxylase small chain PW9, chloroplastic                     | 21.23           | 9.11            | 67.88        | 2                 | 1.42               | 0.00967385  | <i>A. tauschii</i>     |
| I1I3X4                | Ribulose bisphosphate carboxylase small chain PW9, chloroplastic-like                | 19.44           | 8.73            | 27.43        | 1                 | 0.51               | 0.00947877  | <i>B. distachyon</i>   |
| I1IIT7                | Ribulose bisphosphate carboxylase small chain PWS4.3, chloroplastic-like isoform 1   | 19.56           | 8.73            | 33.71        | 1                 | 0.16               | 0.00314987  | <i>B. distachyon</i>   |
| K3ZLI3                | Ribulose bisphosphate carboxylase/oxygenase activase, chloroplastic-like             | 51.62           | 7.74            | 17.2         | 1                 | 2.76               | 0.0258772   | <i>S. italica</i>      |
| M8CA60                | Chlorophyll a-b binding protein 1B, chloroplastic                                    | 26.92           | 5.25            | 43.14        | 1                 | 0.80               | 0.0284038   | <i>A. tauschii</i>     |
| M0X0F4                | Chlorophyll a-b binding protein, chloroplastic                                       | 28.26           | 5.43            | 28.2         | 1                 | 0.82               | 0.0451626   | <i>T. urartu</i>       |
| M0ZEV8                | Chlorophyll a-b binding protein, chloroplastic                                       | 24.08           | 6.33            | 33.33        | 1                 | 0.81               | 0.0343821   | <i>A. tauschii</i>     |
| W5AG21                | Putative chlorophyll a-b binding protein 1C, chloroplastic                           | 7.01            | 5.91            | 14.06        | 1                 | 1.30               | 0.0156988   | <i>A. tauschii</i>     |
| M7Z312                | Chlorophyll a-b binding protein, chloroplastic                                       | 28.28           | 5.64            | 17.29        | 1                 | 0.77               | 0.00841937  | <i>T. urartu</i>       |

| Spot no. <sup>a</sup> | Proteins                                                           | MV <sup>b</sup> | pI <sup>c</sup> | Coverage (%) | Nup. <sup>d</sup> | Ratio <sup>e</sup> | P-value     | Plant species           |
|-----------------------|--------------------------------------------------------------------|-----------------|-----------------|--------------|-------------------|--------------------|-------------|-------------------------|
| F2CZH5                | Cytochrome b6-f complex iron-sulfur subunit                        | 23.73           | 8.18            | 43.24        | 3                 | 1.22               | 0.0216091   | <i>H. vulgare</i>       |
| R7W2G6                | Cytochrome b6-f complex iron-sulfur subunit, chloroplastic         | 27.82           | 6.46            | 10.57        | 1                 | 1.22               | 0.0113752   | <i>A. tauschii</i>      |
| I1GTJ6                | Cytochrome b6-f complex iron-sulfur subunit, chloroplastic-like    | 23.69           | 8.25            | 26.24        | 1                 | 0.34               | 0.000989766 | <i>B. distachyon</i>    |
| A0A0F6NH93            | Cytochrome f                                                       | 35.44           | 8.91            | 35.63        | 1                 | 0.46               | 0.000176532 | <i>P. virgatum</i>      |
| M8BGU7                | Ferredoxin, chloroplastic                                          | 15.04           | 4.49            | 31.21        | 1                 | 1.21               | 0.0182006   | <i>A. tauschii</i>      |
| J9QCY8                | Ferredoxin-NADP reductase                                          | 40.18           | 7.65            | 22.87        | 1                 | 0.56               | 0.0103735   | <i>S. cultivar</i>      |
| D8L9G3                | Sedoheptulose-1,7-bisphosphatase, chloroplast precursor, expressed | 42.07           | 6.57            | 41.22        | 1                 | 1.33               | 0.0206151   | <i>T. aestivum</i>      |
| P46285                | Sedoheptulose-1,7-bisphosphatase, chloroplastic                    | 42.03           | 6.43            | 41.22        | 1                 | 1.63               | 0.00417048  | <i>T. aestivum</i>      |
| R7W0K0                | Calvin cycle protein CP12                                          | 6.89            | 4.70            | 31.25        | 1                 | 1.24               | 0.00177917  | <i>A. tauschii</i>      |
| F2DZH9                | Carbonic anhydrase                                                 | 24.64           | 7.81            | 12.11        | 1                 | 0.47               | 0.000375071 | <i>H. vulgare</i>       |
| B4F9E2                | TPA: Carbonic anhydrase                                            | 44.33           | 8.05            | 8.42         | 1                 | 0.77               | 0.00576693  | <i>Z. mays</i>          |
| W5FQX4                | Chlorophyllase-2, chloroplastic                                    | 19.01           | 6.19            | 23.43        | 1                 | 0.80               | 0.0342267   | <i>T. urartu</i>        |
| M8BTT2                | Protein MRP-like protein                                           | 48.17           | 4.97            | 21.52        | 1                 | 0.79               | 0.0430484   | <i>A. tauschii</i>      |
| K3XMA8                | Protein fluorescent in blue light, chloroplastic-like              | 20.86           | 9.01            | 8.47         | 1                 | 0.72               | 0.0452803   | <i>S. Italica</i>       |
| W5DMP7                | Magnesium-protoporphyrin IX methyltransferase                      | 20.25           | 8.28            | 21.69        | 1                 | 0.59               | 0.0239693   | <i>H. vulgare</i>       |
| F2CQ53                | Proton gradient regulation 7 isoform 1                             | 33.85           | 5.33            | 6.77         | 2                 | 0.83               | 0.0497281   | <i>H. vulgare</i>       |
| A3BKU8                | Oxygen evolving complex of photosystem II subunit                  | 22.58           | 9.80            | 13.15        | 1                 | 0.45               | 0.000832852 | <i>O. sativa</i>        |
| O22575                | Glycine decarboxylase P subunit                                    | 110.95          | 6.80            | 40.64        | 1                 | 1.41               | 0.0169824   | <i>x Tritordeum sp.</i> |

### Lipid metabolism

| Spot no. <sup>a</sup>       | Proteins                                               | MV <sup>b</sup> | pI <sup>c</sup> | Coverage (%) | Nup. <sup>d</sup> | Ratio <sup>e</sup> | P-value     | Plant species          |
|-----------------------------|--------------------------------------------------------|-----------------|-----------------|--------------|-------------------|--------------------|-------------|------------------------|
| W5BK24                      | Glycerol-3-phosphate dehydrogenase SDP6, mitochondrial | 57.83           | 7.96            | 4.21         | 2                 | 0.79               | 0.00242913  | <i>T. urartu</i>       |
| M8B1V8                      | Phospholipase A1, chloroplastic-like                   | 52.04           | 6.80            | 30.38        | 4                 | 0.83               | 0.0320995   | <i>A. tauschii</i>     |
| W5I7C8                      | Putative glycerophosphoryl diester phosphodiesterase 1 | 79.71           | 6.20            | 5.32         | 1                 | 1.27               | 0.0208115   | <i>A. tauschii</i>     |
| F2DDR0                      | Acyl activating enzyme                                 | 55.82           | 6.48            | 9.93         | 1                 | 1.30               | 0.0293746   | <i>H. vulgare</i>      |
| W5GXL1                      | B-ketoacyl reductase                                   | 28.79           | 9.47            | 15.15        | 3                 | 0.81               | 0.0257862   | <i>H. vulgare</i>      |
| <b>RNA metabolism</b>       |                                                        |                 |                 |              |                   |                    |             |                        |
| I1HNH2                      | DEAD-box ATP-dependent RNA helicase 56-like            | 46.20           | 6.33            | 16.83        | 1                 | 0.50               | 0.00276501  | <i>B. distachyon</i>   |
| N1R2R0                      | 33 kDa ribonucleoprotein, chloroplastic                | 38.54           | 5.19            | 16.43        | 1                 | 1.32               | 0.0201259   | <i>A. tauschii</i>     |
| T1N8D9                      | Ribonucleoprotein chloroplastic-like                   | 28.84           | 5.36            | 24.44        | 4                 | 0.74               | 0.0229567   | <i>H. vulgare</i>      |
| J3LP70                      | Ribonucleoprotein chloroplastic-like                   | 27.93           | 4.56            | 14.34        | 1                 | 0.66               | 0.000371694 | <i>O. sativa</i>       |
| M0YI85                      | Splicing factor                                        | 13.54           | 8.27            | 5.79         | 1                 | 0.82               | 0.0219797   | <i>T. urartu</i>       |
| M0V1K8                      | SWIB/MDM2 domain containing expressed                  | 6.59            | 10.10           | 18.03        | 1                 | 0.70               | 0.00617218  | <i>T. urartu</i>       |
| <b>Energy production</b>    |                                                        |                 |                 |              |                   |                    |             |                        |
| A9L9Z4                      | ATP synthase beta subunit                              | 52.96           | 5.27            | 58.78        | 1                 | 1.21               | 0.000715634 | <i>V. microstachys</i> |
| A1E9I7                      | ATP synthase CF0 B subunit                             | 20.96           | 9.61            | 25.14        | 1                 | 0.72               | 0.00718473  | <i>T. aestivum</i>     |
| A0A0F6NQY1                  | ATP synthase CF1 beta subunit                          | 53.92           | 5.50            | 53.41        | 1                 | 1.46               | 0.0269899   | <i>S. bicolor</i>      |
| A0A0E0EPX3                  | ATP synthase subunit a (chloroplast)                   | 60.31           | 9.55            | 14.2         | 1                 | 1.32               | 0.048842    | <i>O. rufipogon</i>    |
| <b>Cell wall metabolism</b> |                                                        |                 |                 |              |                   |                    |             |                        |
| M8BBJ1                      | Fasciclin-like arabinogalactan protein 11-like         | 25.05           | 9.11            | 4.49         | 1                 | 0.71               | 0.0199912   | <i>A. tauschii</i>     |
| A0A0A9EJ37                  | Fasciclin-like arabinogalactan protein 7-like          | 27.15           | 7.36            | 4.23         | 1                 | 0.82               | 0.0223486   | <i>S. italica</i>      |

| Spot no. <sup>a</sup>   | Proteins                                               | MV <sup>b</sup> | pI <sup>c</sup> | Coverage (%) | Nup. <sup>d</sup> | Ratio <sup>e</sup> | P-value    | Plant species        |
|-------------------------|--------------------------------------------------------|-----------------|-----------------|--------------|-------------------|--------------------|------------|----------------------|
| <b>Lipid metabolism</b> |                                                        |                 |                 |              |                   |                    |            |                      |
| W5FGQ7                  | Non-specific lipid transfer protein 5                  | 7.54            | 9.23            | 53.85        | 1                 | 0.29               | 0.00218431 | <i>T. aestivum</i>   |
| M7YJJ9                  | Non-specific lipid-transfer protein                    | 11.65           | 9.04            | 12.71        | 1                 | 0.50               | 0.0322547  | <i>T. urartu</i>     |
| M8BZN6                  | Non-specific lipid-transfer protein 2G                 | 9.17            | 9.26            | 12.09        | 1                 | 0.77               | 0.0162145  | <i>A. tauschii</i>   |
| W5A6H1                  | Non-specific lipid-transfer protein 2G                 | 9.15            | 9.06            | 27.47        | 2                 | 0.77               | 0.00756376 | <i>A. tauschii</i>   |
| M7ZNW1                  | Non-specific lipid-transfer protein 2G                 | 9.21            | 9.07            | 13.19        | 1                 | 0.59               | 0.0062957  | <i>T. urartu</i>     |
| M8D225                  | Non-specific lipid-transfer protein 4.3                | 11.15           | 9.06            | 36.52        | 1                 | 0.53               | 0.00390157 | <i>A. tauschii</i>   |
| L7Q3U1                  | Lipid transfer precursor protein, partial              | 11.98           | 9.55            | 34.71        | 1                 | 1.54               | 0.0135667  | <i>T. aestivum</i>   |
| M8C8N2                  | Lipid transfer protein                                 | 13.32           | 5.80            | 7.32         | 1                 | 0.82               | 0.00339303 | <i>A. tauschii</i>   |
| M0VYA0                  | Lipid transfer protein 7a2b                            | 12.32           | 9.23            | 20.49        | 1                 | 0.49               | 0.0251947  | <i>H. vulgare</i>    |
| Q9ATG4                  | Lipid transfer protein precursor                       | 11.25           | 9.20            | 36.52        | 1                 | 0.82               | 0.0341824  | <i>T. aestivum</i>   |
| W5E5K7                  | Type 1 non-specific lipid transfer protein precursor   | 7.78            | 9.23            | 52.5         | 1                 | 0.52               | 0.00049314 | <i>T. aestivum</i>   |
| Q5NE33                  | Type 1 non-specific lipid transfer protein precursor   | 11.11           | 8.69            | 43.48        | 4                 | 0.48               | 0.00589452 | <i>T. aestivum</i>   |
| Q9S876                  | Basic protein WBP1B                                    | 9.27            | 8.87            | 12.77        | 1                 | 0.46               | 0.0244737  | <i>T. Aestivum</i>   |
| W4ZXN2                  | Amino acid selective channel protein                   | 11.33           | 5.50            | 34.91        | 1                 | 1.62               | 0.0374197  | <i>A. tauschii</i>   |
| M0W593                  | S-adenosylmethionine mitochondrial carrier protein     | 21.52           | 10.74           | 3.94         | 1                 | 0.75               | 0.0110647  | <i>A. Tauschii</i>   |
| W5EAS7                  | 37 kDa inner envelope membrane protein, chloroplastic  | 27.65           | 7.11            | 26.34        | 3                 | 0.79               | 0.0261657  | <i>Tauschii</i>      |
| M0W5Q8                  | Probable membrane-associated 30 kDa chloroplastic-like | 31.88           | 9.17            | 38.87        | 3                 | 1.20               | 0.00865255 | <i>T. urartu</i>     |
| I1GN92                  | Adipocyte plasma membrane-associated protein-like      | 43.91           | 6.55            | 15.62        | 1                 | 0.79               | 0.0024617  | <i>B. distachyon</i> |

| Spot no. <sup>a</sup>      | Proteins                                                           | MV <sup>b</sup> | pI <sup>c</sup> | Coverage (%) | Nup. <sup>d</sup> | Ratio <sup>e</sup> | P-value    | Plant species        |
|----------------------------|--------------------------------------------------------------------|-----------------|-----------------|--------------|-------------------|--------------------|------------|----------------------|
| A0A0D9ZF51                 | Ras-related protein Rab11C-like                                    | 23.87           | 6.93            | 21.86        | 3                 | 1.25               | 0.0272023  | <i>O. sativa</i>     |
| <b>Signal transduction</b> |                                                                    |                 |                 |              |                   |                    |            |                      |
| K3Y9M3                     | 14-3-3-like protein GF14-12-like                                   | 28.41           | 4.97            | 26.8         | 1                 | 0.73               | 0.0020588  | <i>S. italica</i>    |
| W5GYA8                     | Extracellular calcium sensing receptor                             | 33.32           | 9.50            | 22.57        | 1                 | 0.71               | 0.0248772  | <i>H. vulgare</i>    |
| W5DSH1                     | EF hand family expressed                                           | 17.42           | 5.63            | 13.64        | 1                 | 0.69               | 0.0415876  | <i>O. sativa</i>     |
| M8CAC5                     | Inositol monophosphatase                                           | 10.92           | 4.78            | 22.22        | 2                 | 1.21               | 0.0252836  | <i>A. tauschii</i>   |
| M0W468                     | Probable signal recognition particle 43 kda protein, chloroplastic | 24.51           | 5.17            | 12.93        | 1                 | 0.82               | 0.00634209 | <i>H. distichum</i>  |
| W5B8U4                     | Salicylic acid-binding protein 2                                   | 28.47           | 5.01            | 12.6         | 1                 | 1.38               | 0.0308812  | <i>A. tauschii</i>   |
| <b>Other metabolisms</b>   |                                                                    |                 |                 |              |                   |                    |            |                      |
| M8BDB0                     | Retinol dehydrogenase 13                                           | 89.73           | 6.64            | 1.37         | 1                 | 1.22               | 0.00106059 | <i>A. tauschii</i>   |
| W5B8E3                     | Haloalkane dehalogenase 2-like                                     | 43.83           | 7.39            | 13.22        | 1                 | 0.66               | 0.0106465  | <i>A. tauschii</i>   |
| W5B053                     | Insulin degrading enzyme                                           | 28.97           | 7.85            | 5.22         | 1                 | 1.20               | 0.0130097  | <i>H. vulgare</i>    |
| T1L8G1                     | 3-beta hydroxysteroid dehydrogenase isomerase protein              | 26.51           | 5.44            | 43.85        | 4                 | 1.21               | 0.00761572 | <i>H. vulgare</i>    |
| A0A096UKR2                 | 3-beta hydroxysteroid dehydrogenase isomerase protein              | 31.79           | 9.03            | 35.67        | 4                 | 0.76               | 0.00472605 | <i>H. vulgare</i>    |
| W5A3L6                     | Maf-like protein DDB_G0281937-like                                 | 15.86           | 7.46            | 10.49        | 1                 | 1.23               | 0.0343258  | <i>H. vulgare</i>    |
| W5FMZ5                     | Carotenoid cleavage dioxygenase                                    | 61.58           | 6.27            | 18.07        | 2                 | 0.78               | 0.0248091  | <i>B. sylvaticum</i> |
| F2CQN3                     | Divinyl reductase                                                  | 42.78           | 6.79            | 11.56        | 1                 | 0.82               | 0.0396977  | <i>H. vulgare</i>    |
| W5GZW1                     | Divinyl reductase                                                  | 26.93           | 5.27            | 20.82        | 2                 | 0.76               | 0.0154652  | <i>H. vulgare</i>    |
| A0A0A9JCN5                 | Chloroplast stem-loop binding protein of 41 kDa chloroplastic-like | 22.70           | 7.91            | 16.67        | 3                 | 1.20               | 0.00760387 | <i>S. bicolor</i>    |



<sup>a</sup>Accession no.: accession number in Uniprot database.

<sup>b</sup>Protein MW: molecular mass of predicted protein.

<sup>c</sup>pI (kDa): pI of predicted protein.

<sup>d</sup>NuP: number of matched unique peptides identified for each protein.

<sup>e</sup>Ratio: the ratio between intensities of identified protein species in treated vs control plants. The ratios that were statistically significant ( $p < 0.05$ ). Ratio changes in expression level of at least 1.2-fold.

**Additional Table S3.** Comparison of functional classifications of the differentially accumulated proteins between CSP and CTP identified by 2-DE and iTRAQ

| Functional categories        | No. of DEPs (2-DE) | No. of DEPs (iTRAQ) |
|------------------------------|--------------------|---------------------|
| Unknown biological processes | 3                  | 22                  |
| Protein metabolism           | 2                  | 51                  |
| Stress/defense               | 1                  | 41                  |
| Carbohydrate metabolism      | 1+2                | 15                  |
| Photosynthesis               | 8+1                | 38                  |
| Energy production            | 3                  | 4                   |
| Nitrogen metabolism          | 2                  | 2                   |
| RNA metabolism               | 0                  | 6                   |
| Sulfur metabolism            | 0                  | 2                   |
| Lipid metabolism             | 0                  | 5                   |
| Cell wall metabolism         | 0                  | 2                   |
| Membrane and transportation  | 0                  | 19                  |
| Signal transduction          | 0                  | 6                   |
| Other metabolic processes    | 0                  | 10                  |
| Totals                       | 20+3               | 223                 |

DEPs: differentially accumulated proteins
